# Supplementary material for: Development and Validation of Time-Dependent Risk Prediction Models for the Incidence and Progression of Chronic Kidney Disease in Individuals with Type 2 Diabetes Mellitus
Source: Research Square preprint supplement (doi:10.21203/rs.3.rs-6591201/v1), 2025-05-19
Supplement: Supplementary file 1 [file 02560ecfb561c218bddf60a5.pdf]

# Supplementary Information

## Appendix

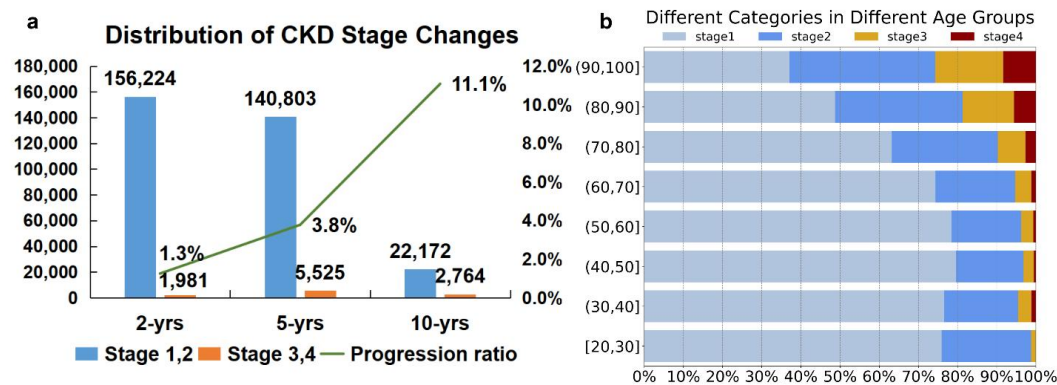

**Fig. A1: Proportions of chronic kidney disease stages by age and the changes in 2-, 5- and 10-years**

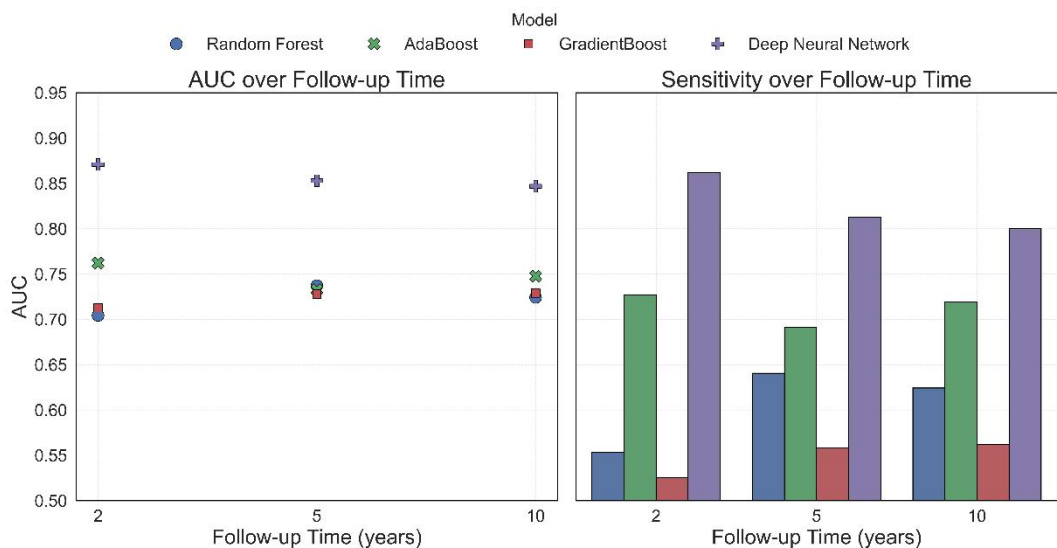

**Fig. A2: Comparison of deep neural network performance with other machine learning models.**

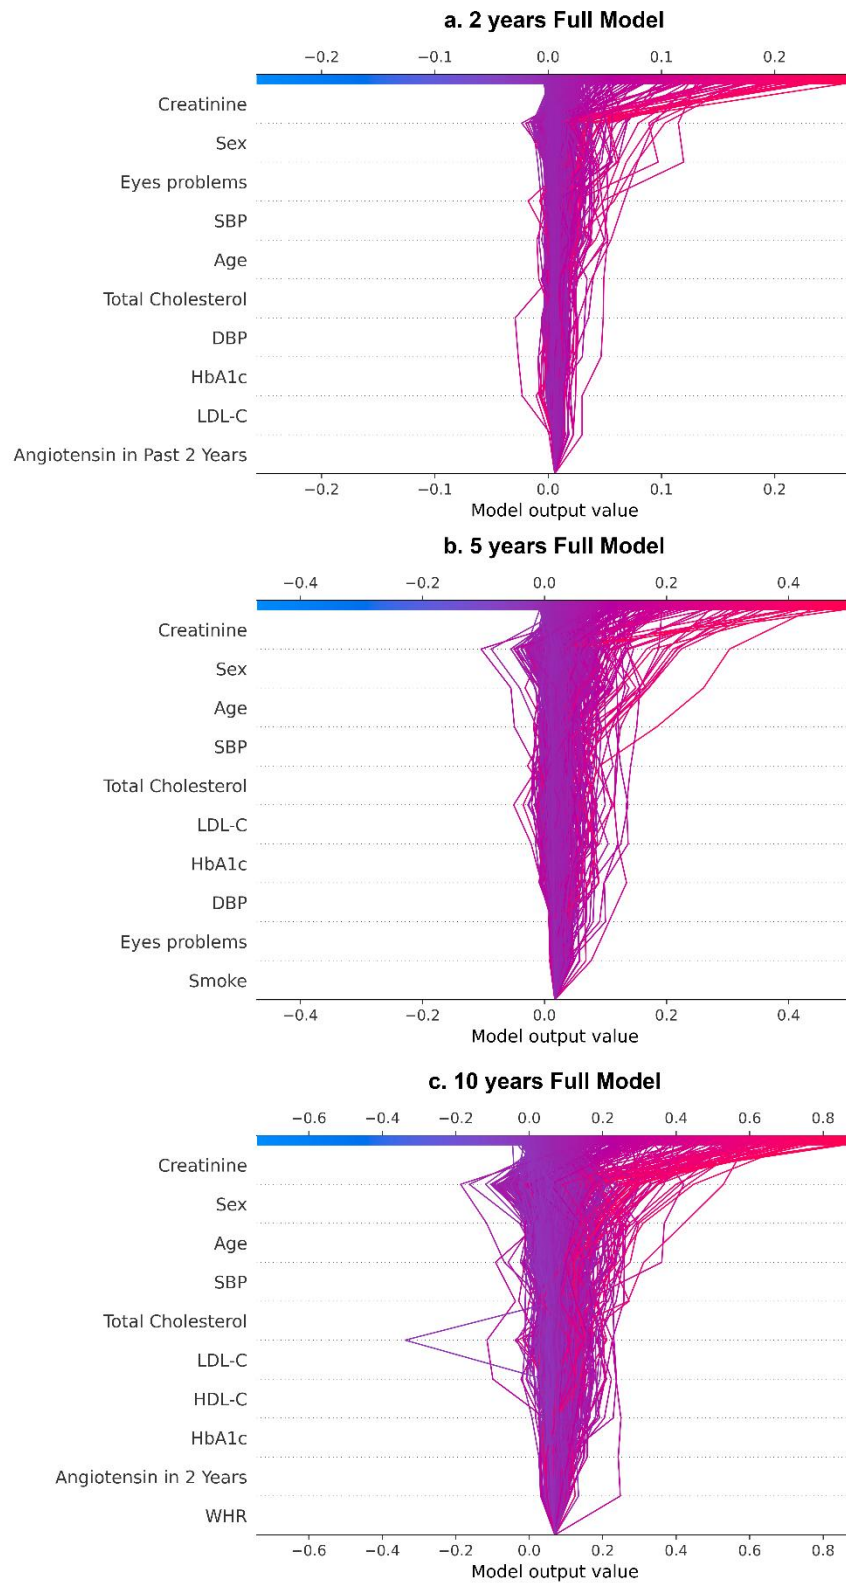

**Fig. A3: Contribution of the features of the CKD progression prediction model to the model output at different follow-up years**

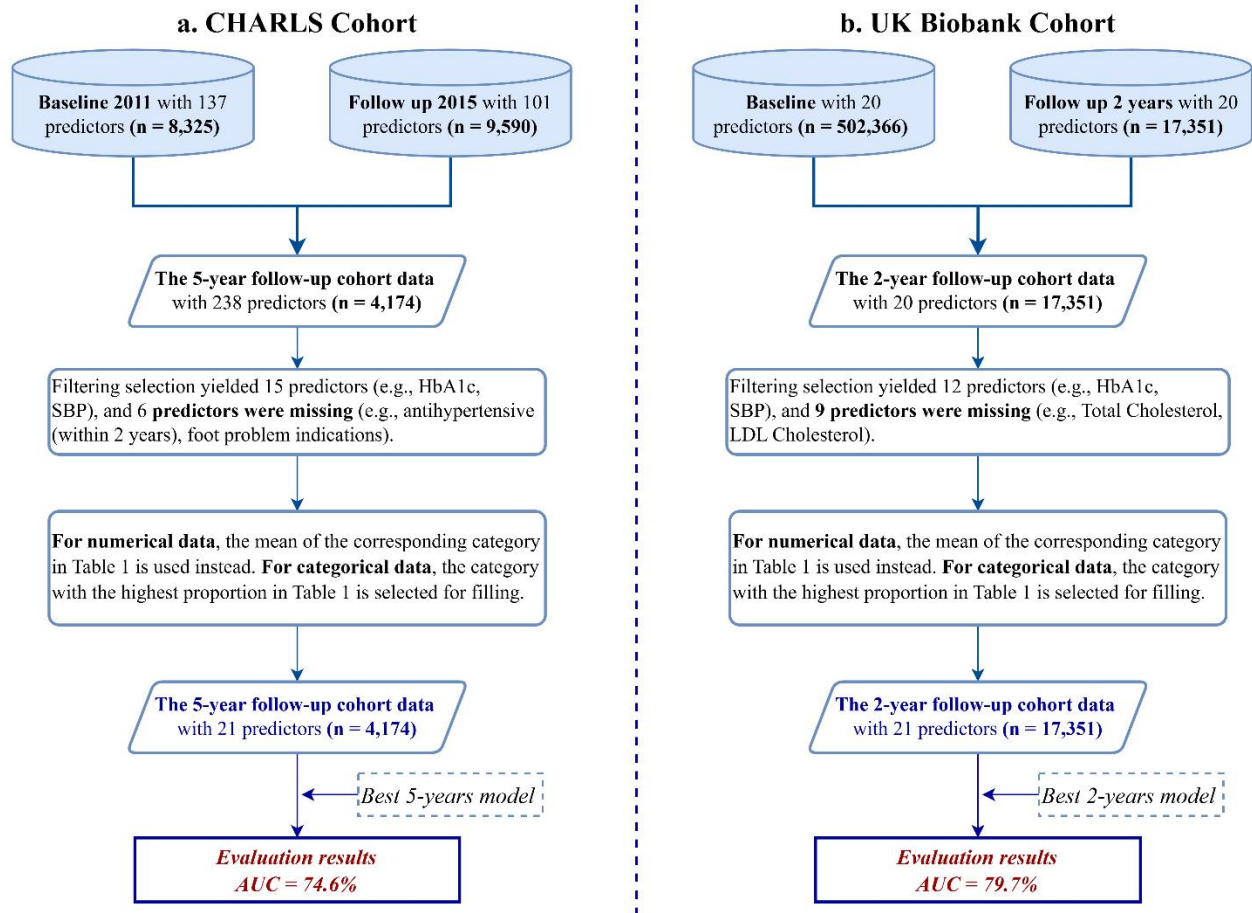

**Fig. A4: Workflow for external evaluation of CHARLS and UK Biobank data**

**Table A1: Deep neural network model performance compares with machine leaning models**

| <i>Follow up time (years )</i> | <i>Model</i>               | <i>Oversampling approaches</i> | <i>AUC</i>    | <i>Sensitivity</i> |
|--------------------------------|----------------------------|--------------------------------|---------------|--------------------|
| <b>2</b>                       | <i>Random Forest</i>       | <i>ADASYN</i>                  | 0.7043        | 0.5534             |
| <b>5</b>                       | <i>Random Forest</i>       | <i>ADASYN</i>                  | 0.7372        | 0.6406             |
| <b>10</b>                      | <i>Random Forest</i>       | <i>ADASYN</i>                  | 0.7242        | 0.6243             |
| <b>2</b>                       | <i>AdaBoost</i>            | <i>ADASYN</i>                  | 0.7622        | 0.7273             |
| <b>5</b>                       | <i>AdaBoost</i>            | <i>ADASYN</i>                  | 0.7327        | 0.6912             |
| <b>10</b>                      | <i>AdaBoost</i>            | <i>ADASYN</i>                  | 0.7476        | 0.7190             |
| <b>2</b>                       | <i>GradientBoost</i>       | <i>ADASYN</i>                  | 0.7127        | 0.5252             |
| <b>5</b>                       | <i>GradientBoost</i>       | <i>NAN</i>                     | 0.7280        | 0.5581             |
| <b>10</b>                      | <i>GradientBoost</i>       | <i>NAN</i>                     | 0.7290        | 0.5621             |
| <b>2</b>                       | <i>Deep Neural Network</i> | <i>NAN</i>                     | <b>0.8710</b> | <b>0.8621</b>      |
| <b>5</b>                       | <i>Deep Neural Network</i> | <i>NAN</i>                     | <b>0.8530</b> | <b>0.8129</b>      |
| <b>10</b>                      | <i>Deep Neural Network</i> | <i>NAN</i>                     | <b>0.8470</b> | <b>0.8000</b>      |

**Table A2: Comparison of the AUC and sensitivity of different deep learning models based on different oversampling techniques over different follow-up times.**

| <i>Follow up time</i> | <i>Model</i>     | <i>oversampling approaches</i> | <i>AUC</i>    | <i>Sensitivity</i> |
|-----------------------|------------------|--------------------------------|---------------|--------------------|
| <b>2</b>              | <i>DNN model</i> | <i>N</i>                       | <b>0.8710</b> | <b>0.8621</b>      |
| <b>5</b>              | <i>DNN model</i> | <i>N</i>                       | 0.8530        | 0.8129             |
| <b>10</b>             | <i>DNN model</i> | <i>N</i>                       | 0.8470        | 0.8000             |
| <b>2</b>              | <i>DNN model</i> | <i>Borderline SMOTE</i>        | 0.7586        | 0.6429             |
| <b>5</b>              | <i>DNN model</i> | <i>ADASYN</i>                  | 0.7768        | 0.6720             |
| <b>10</b>             | <i>DNN model</i> | <i>Borderline SMOTE</i>        | 0.7989        | 0.7543             |

**Table A3. Weibull Accelerated Failure Time (AFT) Model Summary for CKD Progression**

| <i>Variable</i>          | <i>Coef</i> | <i>SE</i> | <i>95% CI (Coef)</i> | <i>exp(Coef)</i> | <i>z</i> | <i>p-value</i> |
|--------------------------|-------------|-----------|----------------------|------------------|----------|----------------|
| <i>lambda_ Intercept</i> | 2.42        | 0.03      | [2.36, 2.49]         | 11.28            | 71.83    | <0.005         |
| <i>lambda_ RiskScore</i> | -1.28       | 0.10      | [-1.48, -1.07]       | 0.28             | -12.18   | <0.005         |
| <i>rho_ Intercept</i>    | 1.09        | 0.03      | [1.03, 1.14]         | 2.97             | 38.92    | <0.005         |
